# Supplementary material for: Targeting Androgen Receptor as a Novel Radiosensitizing Therapy to Improve Long-Term Survival and Anti-tumor Immunity in Glioblastoma via TGF-β/Smad3 Axis Reprogramming
Source: Research Square preprint supplement (doi:10.21203/rs.3.rs-8585892/v1), 2026-02-05
Supplement: Supplementary file 2 [file 41745a5712c00cfc3f0ac4d2.docx]

**­SUPPLEMENTARY FILE ( FULL BLOTS:** **HIGHLIGHTED AREA)**

**Targeting Androgen Receptor as a Novel Radiosensitizing Therapy to Improve Long-Term Survival and Anti-tumor Immunity in Glioblastoma *via* TGF-β/Smad3 Axis Reprogramming**

*1,8Chi Zhang, M.D., Ph.D.; 1Jyoti B. Kaushal, Ph.D.; 1Nan Zhao, M.B.B.S.; 1Rubayat Khan, Ph.D.; 2Kan Liu, Ph.D.; 2Chi Zhang, Ph.D.; 1Fei Wang, M.B.B.S.; 3Jie Chen, M.D., Ph.D.; 4Bingjie Guan, B.S.; 1Shuo Wang, Ph.D.; 5Tom K. Hei, Ph.D.; 6Tony J. C. Wang, M.D.; 7Yuguo Lei, Ph.D.; 9MicheleR. Aizenberg,M.D.; 1Chi Lin, M.D., Ph.D.

### *1Department of Radiation Oncology, Fred & Pamela Buffett Cancer Center, University of Nebraska Medical Center, Omaha, NE*

*2School of Biological Sciences, University of Nebraska - Lincoln, Lincoln, NE*

*3Department of Pathology, University of Nebraska Medical Center, Omaha, NE*

*4Department of Radiation Oncology, United Hospital of Fujian, Fuzhou, Fujian, P.R. China*

*5Center for Radiological Research, College of Physicians and Surgeons; Columbia University, New York, New York*

*6Department of Radiation Oncology, Columbia University Irving Medical Center, New York, New York; Herbert Irving Comprehensive Cancer Center, New York, NY*

*7Department of Biomedical Engineering, Huck Life Science Institute, Pennsylvania State University, University Park, PA*

*8Department of Radiation Oncology, Mayo Clinic Arizona, Phoenix, AZ*

### *9Department of Neurosurgery, Fred & Pamela Buffett Cancer Center, University of Nebraska Medical Center, Omaha, NE*

**Figure 4F**


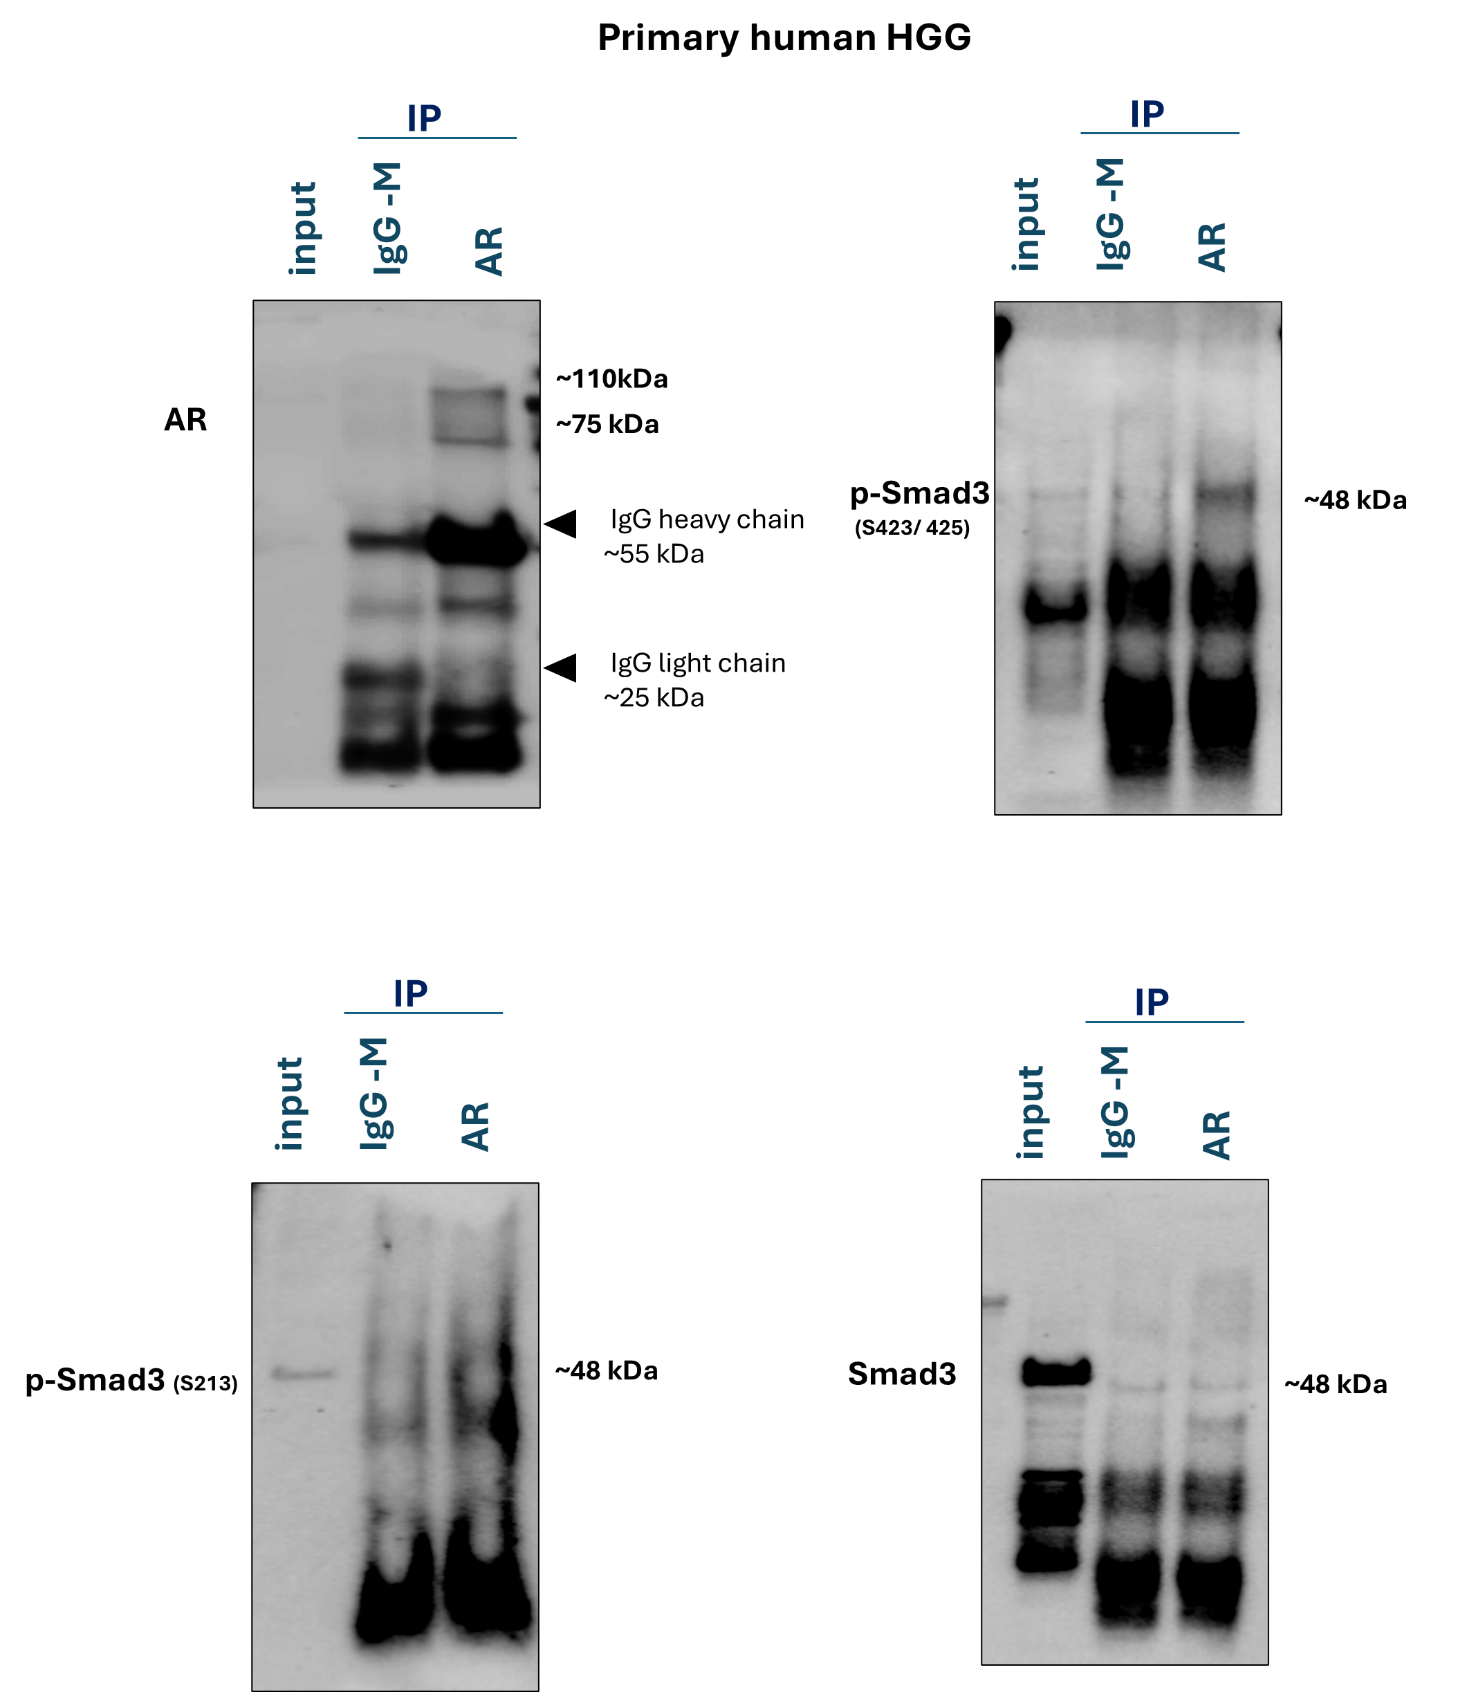


**Figure 4 G**


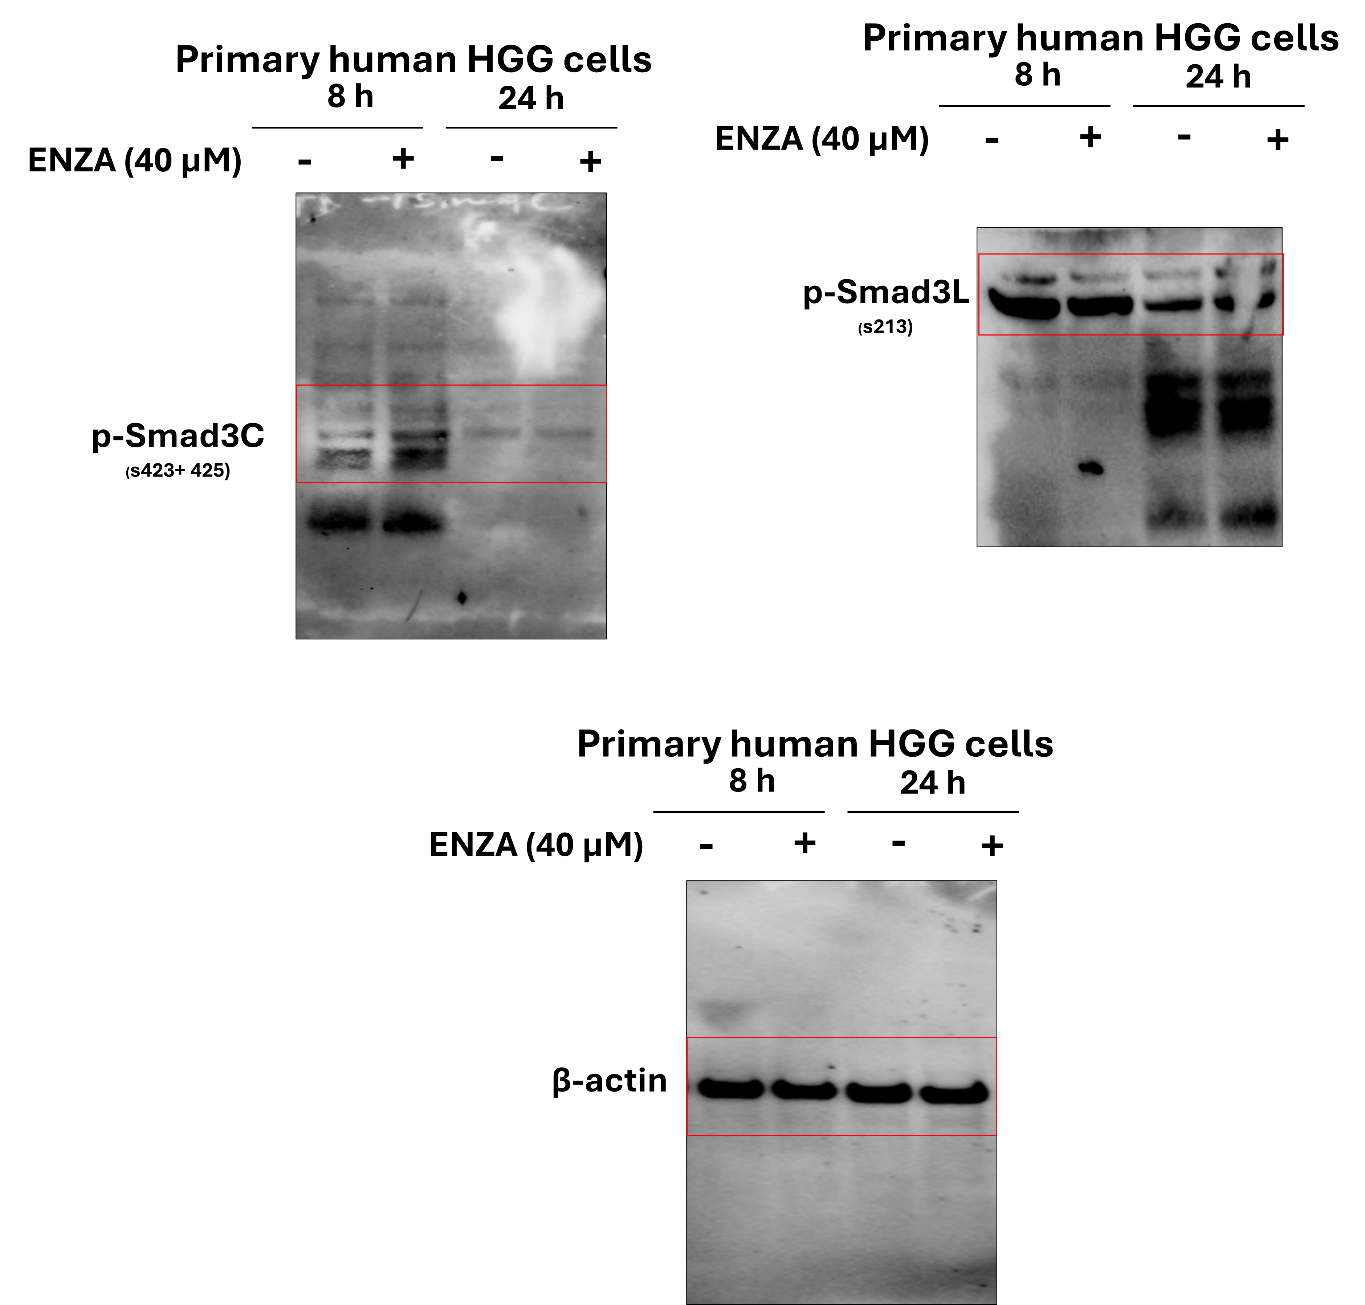


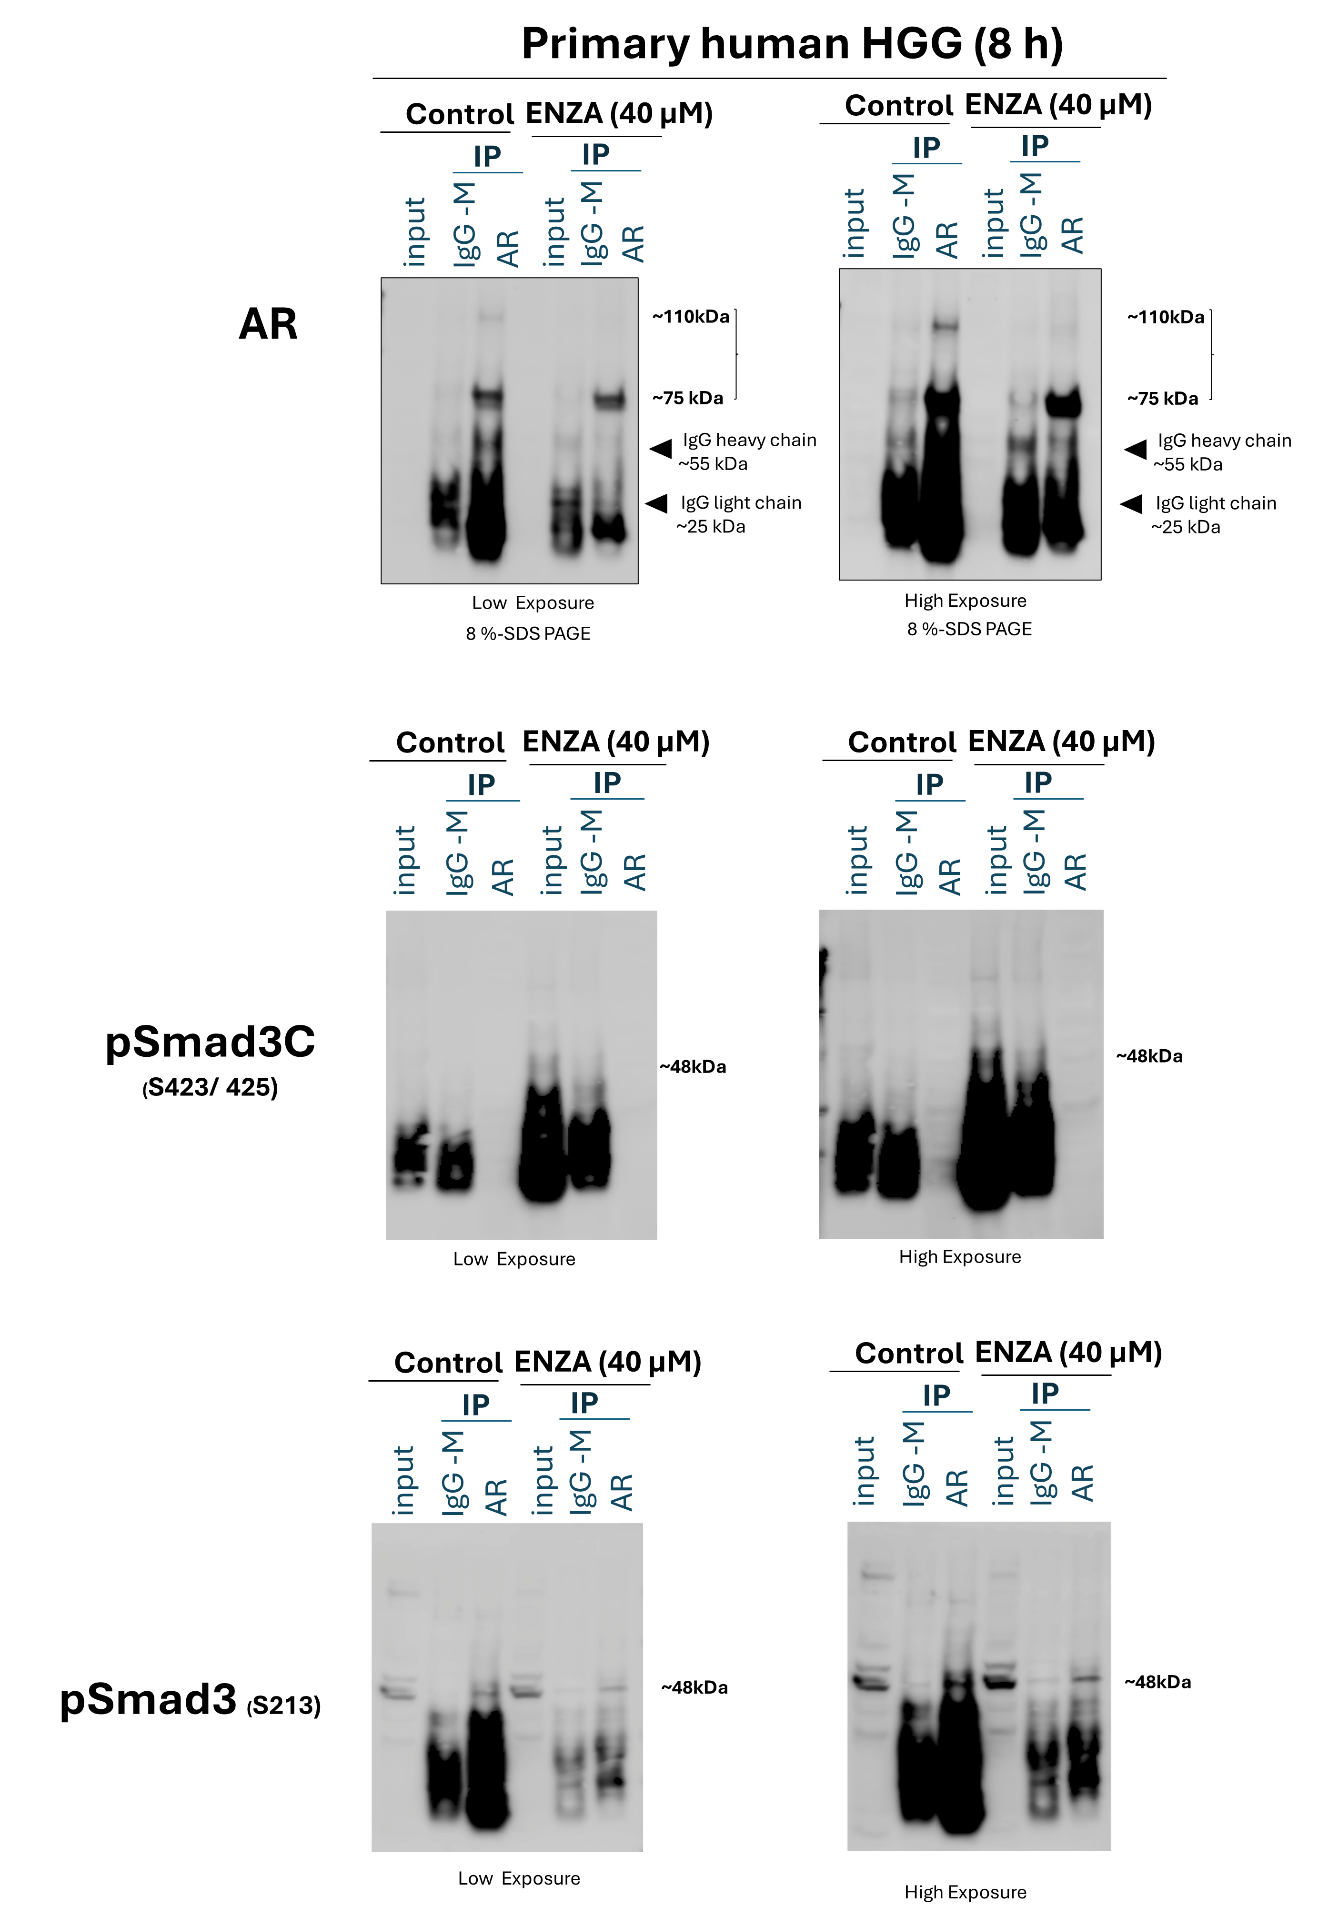


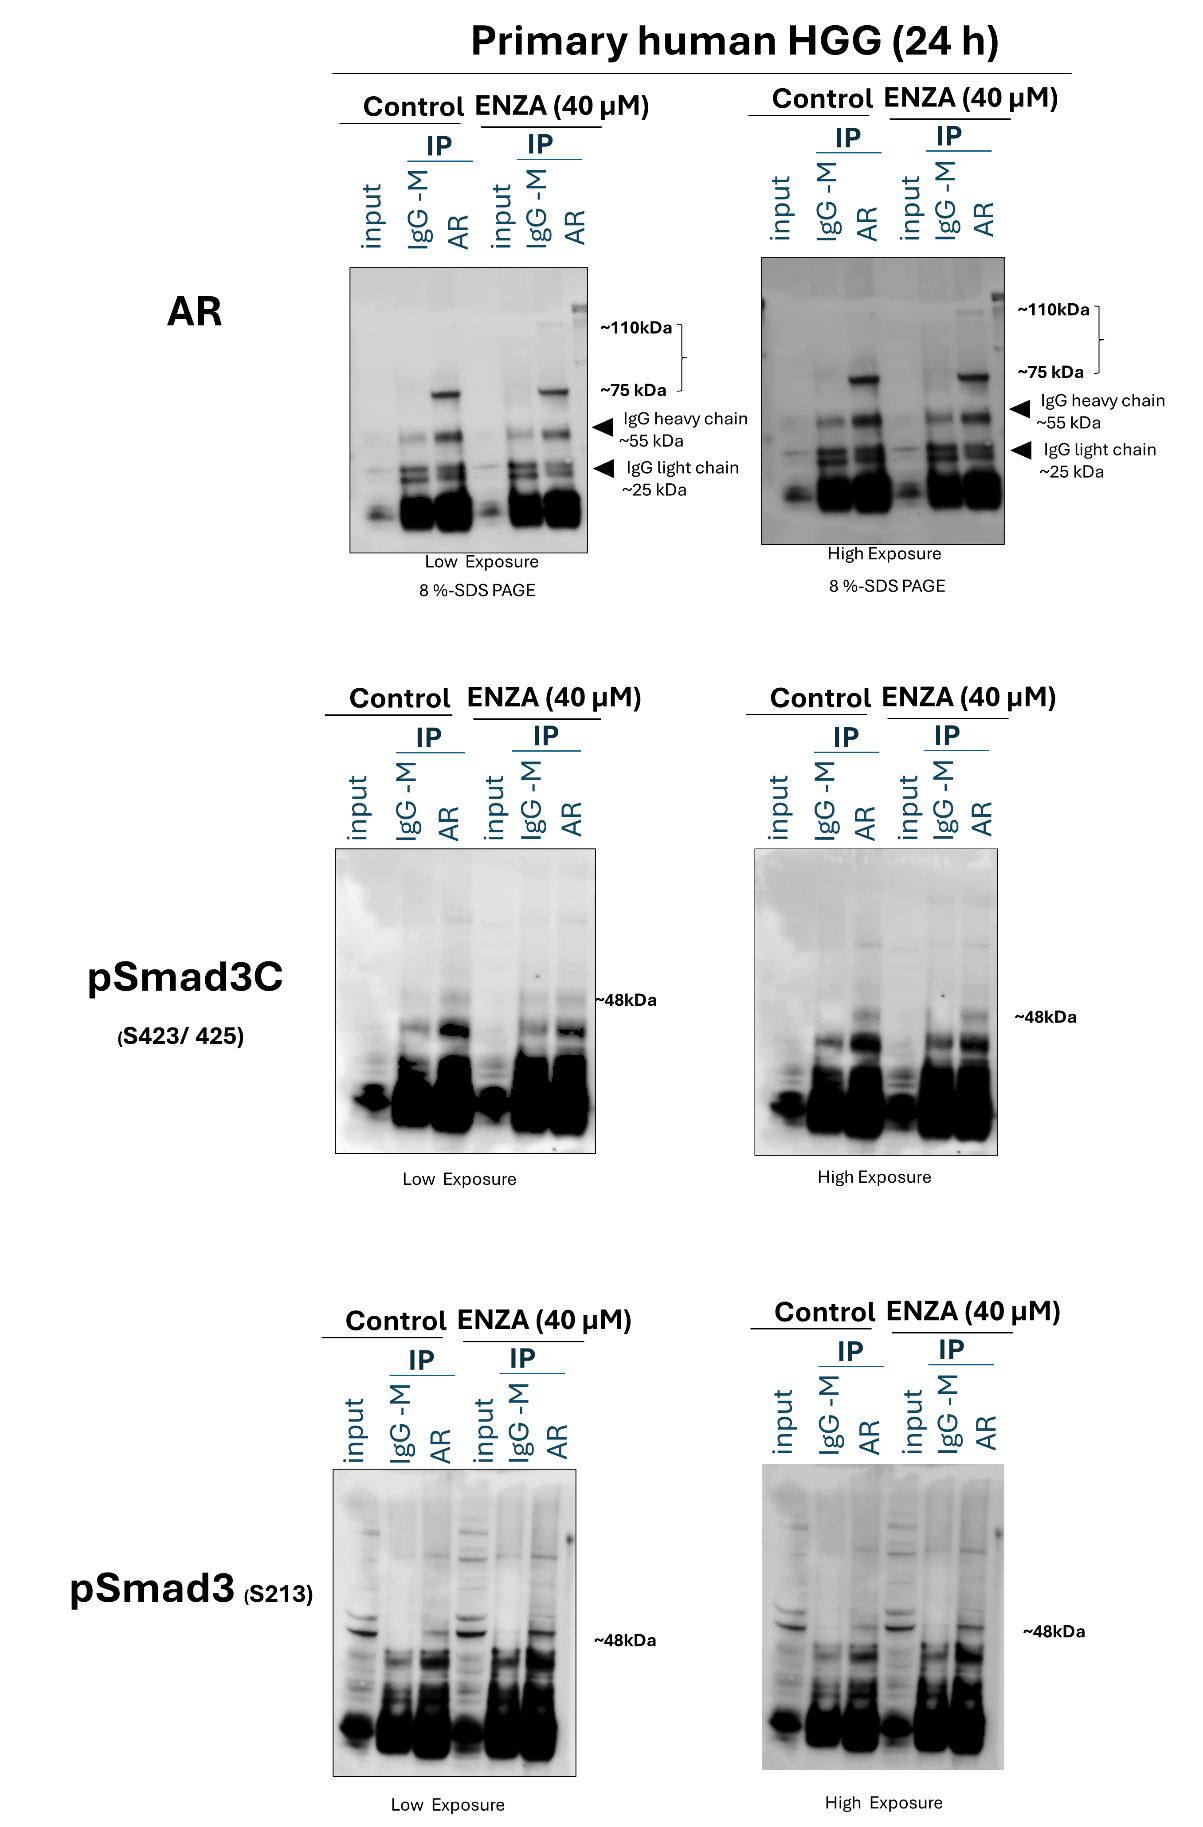


**Figure 5 D**

**
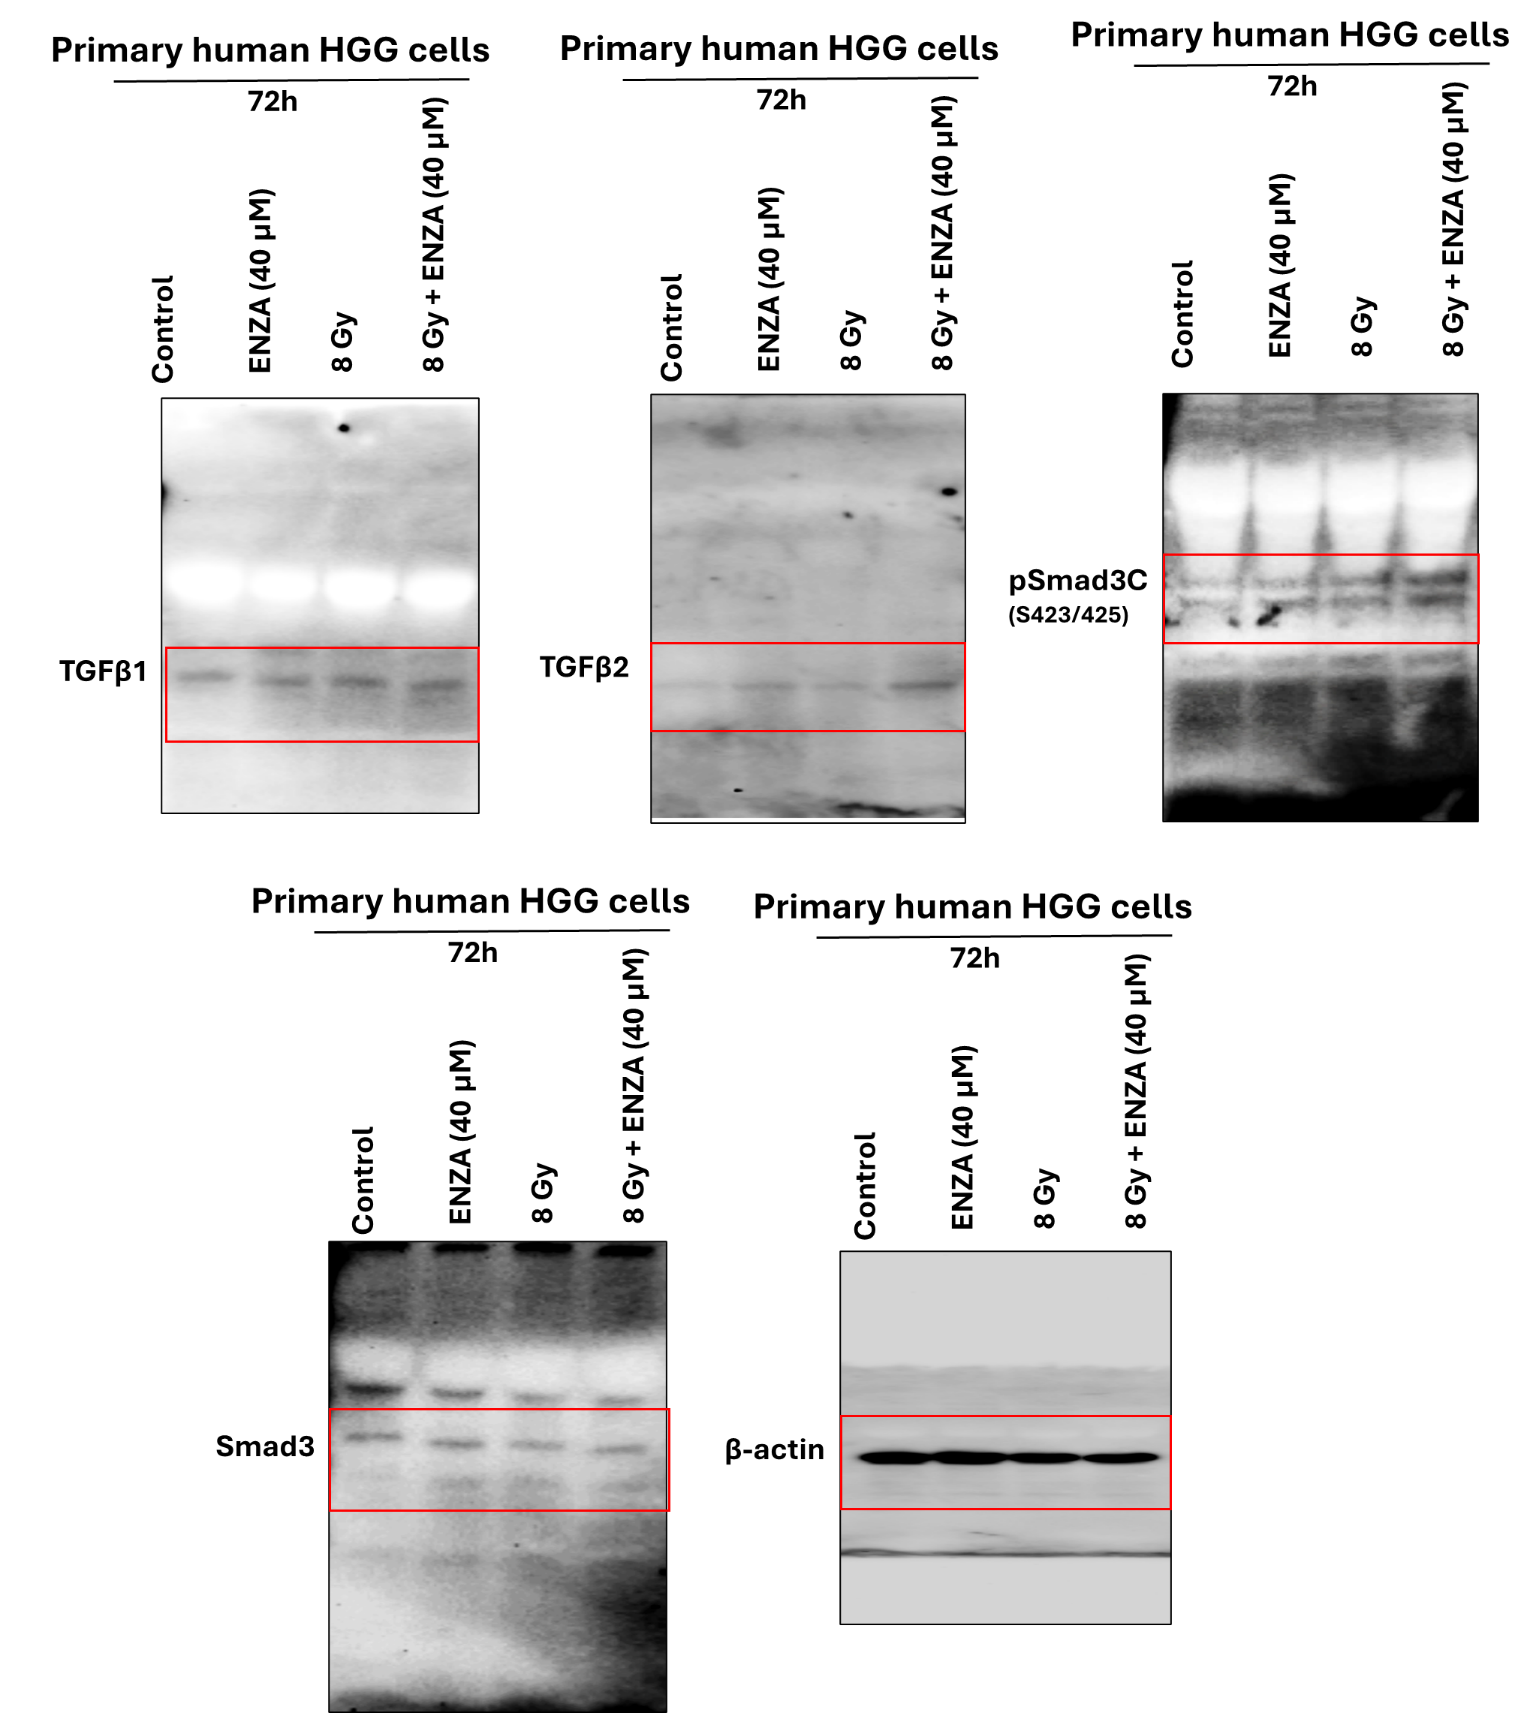
**
